# Supplementary material
Source: Research Square preprint supplement (doi:10.21203/rs.3.rs-9740918/v1)
Supplement: Supplementary file 1 [file 3ab9a205d1cafa079ebb23ef.docx]

**Appendix A**

| ID | Abbreviated Reference | Year | Country/Region | Document Type | Database / Institutional Source | Main Objective or Focus | Analytical Relevance within the Study |
| --- | --- | --- | --- | --- | --- | --- | --- |
| D01 | WHO Global Health Workforce Report | 2022 | Sub-Saharan Africa | International technical report | World Health Organization | Health workforce and institutional strengthening | Global framework on human resources for health |
| D02 | FIP Global Competency Framework | 2020 | International | Policy document | International Pharmaceutical Federation | Global pharmaceutical competencies | Comparative curricular benchmark |
| D03 | Pharmacy Education in Ghana | 2021 | Ghana | Scientific article | Scopus | PharmD curricular reforms | Anglophone competency-based model |
| D04 | Clinical Pharmacy Development in Nigeria | 2020 | Nigeria | Scientific article | Web of Science | Clinical integration and hospital practice | Development of Pharmaceutical Care |
| D05 | Pharmaceutical Education Reform in South Africa | 2022 | South Africa | Scientific article | PubMed | Educational innovation and accreditation | Regional regulatory consolidation |
| D06 | National Health Plan | 2021 | Angola | Government document | Ministry of Health of Angola | Organisation of the healthcare system | National structural contextualisation |
| D07 | Pharmaceutical Sciences Curriculum | 2023 | Cape Verde | University curricular document | University of Cape Verde | Undergraduate pharmaceutical education | Emerging Lusophone case study |
| D08 | Pharmaceutical Workforce in Lusophone Africa | 2024 | Lusophone Africa | Scientific article | Scopus | Shortage of pharmaceutical professionals | Structural fragility of the pharmaceutical workforce |
| D09 | UNESCO Higher Education Report | 2021 | Africa | Institutional report | UNESCO | Higher education and regional inequality | African educational context |
| D10 | UNDP Human Development Report | 2022 | Sub-Saharan Africa | International report | United Nations Development Programme | Human development and institutional capacities | Comparative structural determinants |
| D11 | Pharmacy Regulation in Mozambique | 2019 | Mozambique | Regulatory document | National Pharmacy Council | National pharmaceutical regulation | Regional Lusophone comparison |
| D12 | Competency-Based Education in SSA | 2023 | Sub-Saharan Africa | Scientific review | Web of Science | Competency-based education | Regional reform trends |
| D13 | Brain Drain and Health Workforce Migration | 2020 | Africa | Scientific article | PubMed | Health professional migration | Analysis of pharmaceutical brain drain |
| D14 | Pharmaceutical Care in African Universities | 2022 | Sub-Saharan Africa | Scientific article | Scopus | Integration of Pharmaceutical Care | Curricular comparison |
| D15 | African Medicines and Regulatory Harmonisation | 2021 | Africa | Regional report | African Union / WHO | Regulatory harmonisation | Regional pharmaceutical governance |
| D16 | Academic Mobility in African Health Education | 2023 | Africa | Scientific article | Scopus | Regional academic mobility | African university integration |
| D17 | Pharmacy Internship Standards | 2020 | South Africa | Regulatory document | South African Pharmacy Council | Professional practical training | Accreditation model |
| D18 | Human Resources for Health Strategy | 2022 | Africa | Strategic document | World Health Organization | Health workforce planning | Global interpretative framework |
| D19 | Health Professions Education in SSA | 2024 | Sub-Saharan Africa | Integrative review | Web of Science | Education in health professions | Interdisciplinary contextualisation |
| D20 | Pharmacy Curriculum Modernisation | 2023 | Angola | Institutional document | Agostinho Neto University | Pharmaceutical curricular reform | Lusophone educational transformation |
